# Supplementary material for: Human Nasal Epithelium Organoids for Assessing Neutralizing Antibodies to a Protective SARS-CoV-2 Virus-like Particle Vaccine
Source: MDPI journal article supplement (doi:10.3390/organoids3010002), 2024-02-01
Supplement: s1 [file s1]

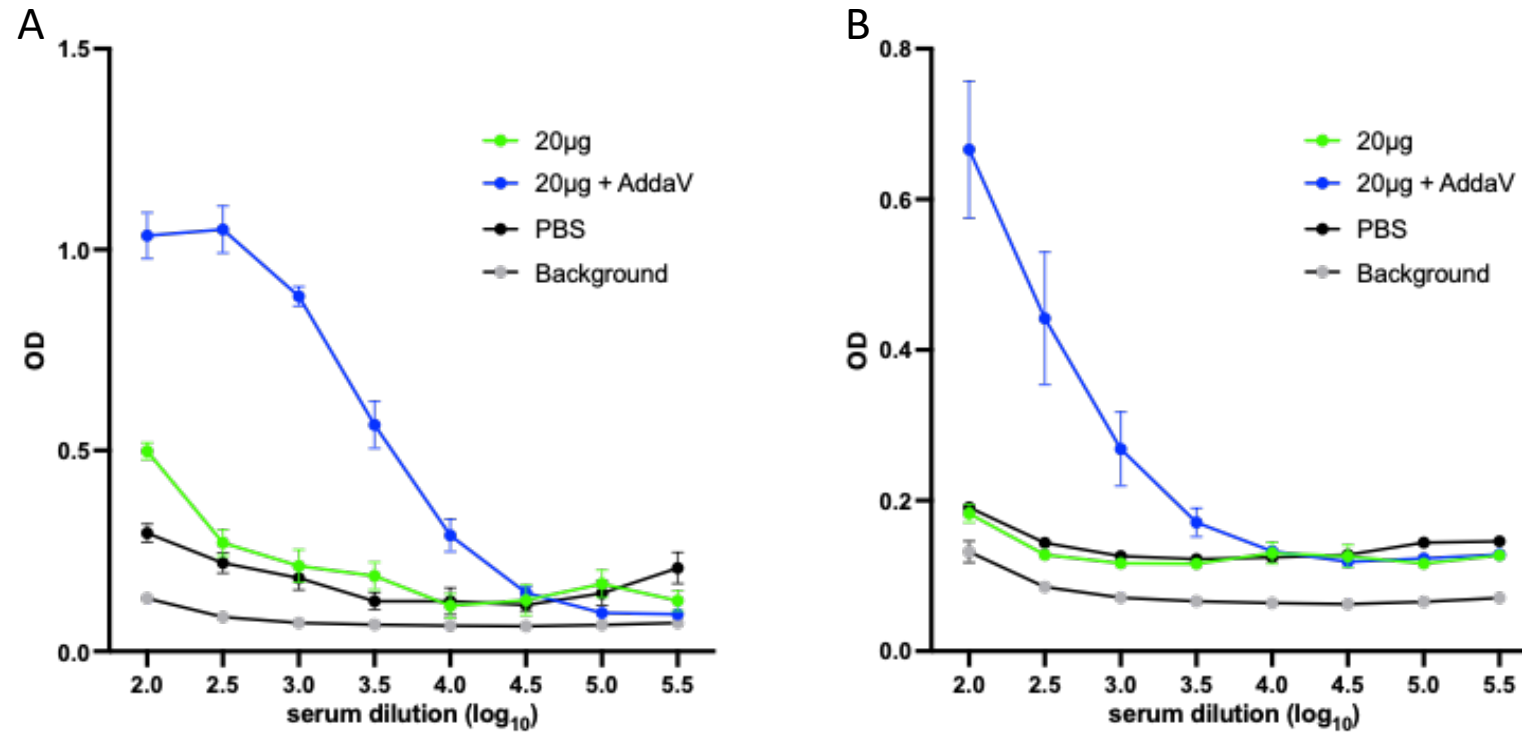

**Figure S1. Direct Ancestral-SARS-CoV-2 VLP and anti-RBD ELISA. (A)** ELISA performed with sera from mice 42 days after immunisation on plates coated with 20µg/mL of VLPs. **(B)** anti-RBD ELISA performed with sera from mice 42 days after immunisation on plates coated with 2µg/mL of purified Ancestral RBD.

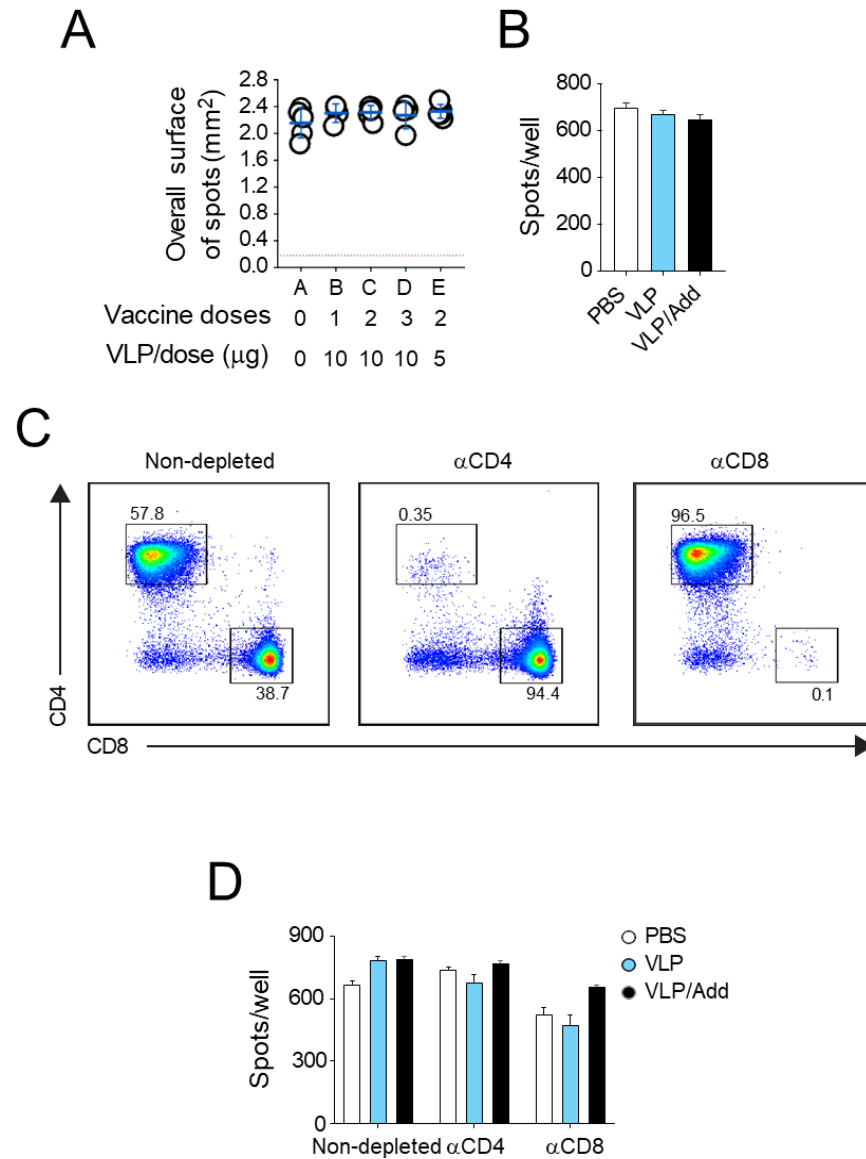

**Figure S2. Splenocyte stimulation positive controls and T cell depletion efficiencies.** **(A)** Responses to the positive control, concanavalin A (5  $\mu\text{g}/\text{mL}$ ), by splenocytes in Figure 4A. Blue lines denote Mean  $\pm$  SD. **(B)** Responses to 5  $\mu\text{g}/\text{mL}$  concanavalin A by splenocytes in Figure 4C. Error bars denote SD. **(C)** Depletion efficiency in Figure 4E, measured by FACS by gating on  $\text{TCR}\beta^+$  cells and plotting  $\text{CD4}^+$  vs  $\text{CD8}^+$  cells. **(D)** Responses to 5  $\mu\text{g}/\text{mL}$  concanavalin A by splenocytes in Figure 4E. Error bars denote SD.

**Supplementary table S1.** Primers used to clone S, E and M genes individually from a single codon optimised SEM genetic construct

| Gene     | Primer Forward 5'-3'             | Primer Reverse 5'-3'                |
|----------|----------------------------------|-------------------------------------|
| Spike    | CGGGTACCGCCACCATGTTCGTGTTTCTGG   | CGGCGGCCGCTCATCAGGTGTAGTGCAGTTTCACG |
| Envelope | GTGCCTGATCTGCTCGTGTGATGAGCGGCCGC | CGGCGGCCGCTCATCACACGAGCAGATCAGGCA   |
| Membrane | CGGGTACCGCCACCATGGCCGACAGCAATGG  | CGGCGGCCGCTCATCACTGCACCAGCAGTGC     |
